# Supplementary material for: Mixed Compound of DCPTA and CCC Increases Maize Yield by Improving Plant Morphology and Up-Regulating Photosynthetic Capacity and Antioxidants
Source: PLoS One. 2016 Feb 12;11(2):e0149404. doi: 10.1371/journal.pone.0149404 (PMC4752268; doi:10.1371/journal.pone.0149404)
Supplement: S3 File — This file contains date including plant height, lodging percentage, stem characters, leaf dry weight and leaf area per plant. (XLSX) [file pone.0149404.s003.xlsx]

## Sheet: plant height
		cm
	CK	234	221	233	239	223
	CCC	205	209	213	206	192
	DCPTA	250	250	256	243	239
	PCH	215	225	199	219	217

## Sheet: lodging percentage
		%
		CK	9.4	9.96	8.81
		CCC	16.43	14.11	15.42
		DCPTA	9.53	8.85	8.11
		PCH	13.85	14.99	12.77

## Sheet: leaf area
				2011	2012
			CK	7220	8124		cm2
				6975	8133
				6727	8369
				7216	8255
				6732	8374
			CCC	6262	7242
				6106	6920
				5941	7247
				6258	7076
				5948	6920
			DCPTA	7547	9292
				7654	9104
				7769	9303
				7554	9207
				7766	9099
			PCH	7151	8274
				6815	8346
				7146	8412
				6985	8271
				6818	8412

## Sheet: leaf dry weight per plant
				2011	2012
	g		CK	50.28	64.16
				53.23	57.24
				47.24	64.13
				53.3	60.76
				47.2	57.31
			CCC	44.64	51.5
				43.26	58.2
				41.76	54.83
				44.63	51.56
				41.71	58.3
			DCPTA	59.68	69.25
				55.26	71.92
				59.62	66.46
				57.41	71.92
				55.28	66.5
			PCH	50.4	67
				53.83	63.94
				52.19	60.98
				50.45	66.95
				53.76	61.08

## Sheet: bending strength
	2011						2012
N			3	5					3	5
		CK	228	157				CK	222	130
			238	130					214	145
			218	154					202	130
			236	145					205	142
			220	131					218	148
		CCC	228	174				CCC	247	157
			254	169					231	153
			245	161					251	145
			230	177					246	150
			258	159					230	150
		DCPTA	242	164				DCPTA	240	145
			239	156					216	140
			230	169					238	149
			237	156					231	146
			232	155					220	142
		PCH	270	167				PCH	264	176
			248	187					235	172
			272	180					260	162
			265	160					261	178
			250	191					234	157

## Sheet: puncture strength
			2011							2012
	N				1	3	5					1	3	5
				CK	53	51	43				CK	43	33	33
					55	50	49					49	45	44
					45	45	43					50	41	35
					57	53	50					40	35	41
					45	41	45					53	46	37
				CCC	64	50	49				CCC	62	44	41
					63	55	57					52	51	45
					60	62	55					59	54	41
					65	49	46					60	42	44
					58	64	58					52	56	45
				DCPTA	46	56	45				DCPTA	48	49	44
					58	54	50					56	40	39
					50	46	46					55	47	36
					56	53	51					49	45	46
					60	46	48					57	41	35
				PCH	77	67	63				PCH	69	46	51
					62	63	55					56	53	46
					76	57	60					67	50	43
					71	69	59					64	47	53
					64	55	53					59	54	42

## Sheet: internode length
	cm		2011							2012
					1	3	5					1	3	5
				CK	7.86	13.85	17.16				CK	8.01	13.28	19.01
					7.51	14.83	18.26					7.52	14.11	18.61
					7.08	13.17	19.06					7.01	12.57	18.01
					7.79	14.8	17.06					7.94	14.01	18.71
					7.11	13.1	19.26					7.07	12.63	18.21
				CCC	7.03	12.11	16.7				CCC	6.03	11.35	17.22
					6.55	12.86	17.42					7.61	11.68	17.62
					6.03	12.56	16					6.84	11.1	16.87
					7.04	12.16	16.08					6.05	11.28	15.82
					6	12.81	17.36					7.57	11.54	16.32
				DCPTA	8.63	15.01	20.75				DCPTA	8.69	14.38	22.61
					7.05	14.31	18.67					7.35	15.5	21.54
					7.86	14.21	20.35					8.63	14.69	20.67
					7.01	14.96	19.81					7.98	14.18	22.41
					8.65	14.06	18.97					7.44	15.2	20.97
				PCH	7.51	13.83	18.4				PCH	7.11	11.97	17.7
					6.01	12.98	16.74					7.51	11.21	15.95
					7.47	12.08	18.25					7.02	10.65	17.61
					6.78	13.79	17.42					7.58	11.77	16.81
					6.03	12.07	16.79					7.33	10.95	15.99

## Sheet: internode diameter
		2011							2012
mm				1	3	5					1	3	5
			CK	27.98	23.82	24.72				CK	30.28	25.84	22.6
				28.69	27.5	22.78					28.8	28.08	26.58
				27.38	25.76	20.64					27.32	25.52	24.84
				28.5	23.42	24.22					29.88	28.6	22.9
				27.56	27.8	21.04					27.72	26.76	26.78
			CCC	34.94	30.84	24.92				CCC	33.94	28.66	25.99
				32.76	33.9	28.36					33.22	31.76	27.14
				30.5	27.98	26.74					32.1	29.76	28.69
				34.62	33.7	25.42					33.34	28.36	25.69
				30.78	28.28	28.76					32.5	31.26	29.19
			DCPTA	30.36	27.04	23.96				DCPTA	33.18	25.62	23.92
				30.64	28.6	26.28					27.02	29.2	27.78
				29.66	26.74	25.12					32.68	27.42	23.62
				28.62	29	23.66					30.3	25.24	28.18
				28.92	27.72	26.08					27.32	28.62	26
			PCH	37.54	29.96	27.76				PCH	37.96	33.76	29.66
				34.94	33.96	27.22					33.08	31.58	26.8
				32.46	29.76	26.68					37.58	29	29.32
				37.02	31.86	27.36					35.22	33.16	28.32
				32.94	34.26	27.08					33.26	29.4	27.2
